# Supplementary material for: The Putative Auto-Inhibitory Domain of Durum Wheat Catalase (TdCAT1) Positively Regulates Bacteria Cells in Response to Different Stress Conditions
Source: MDPI journal article supplement (doi:10.3390/antiox11091820), 2022-09-15
Supplement: s1 [file s1]

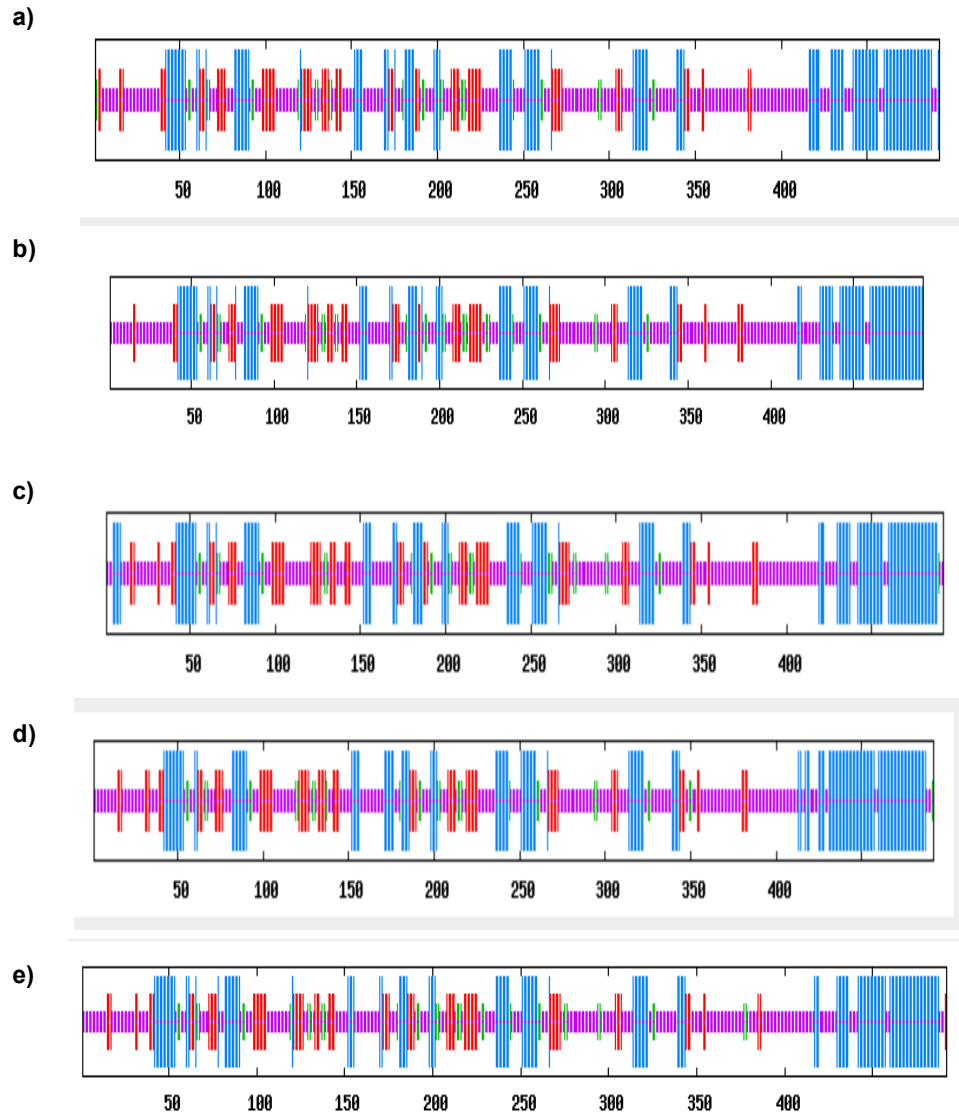

**Supplementary Figure S1.** Comparison of the secondary structures of CAT1s. **(a)** *Triticum durum*, **(b)** *Brachypodiumdictyosum* (XP\_003558892.1), **(c)** alpine snowbell (*Soldanella alpine*, O24339), **(d)** upland cotton (*Gossypium hirsutum*, P17598), **(e)** *Aegilops taushii* (XP\_020164896.1) and *Triticum aestivum* (Q43206.1) as revealed by SOPMA. The helix, sheet, turn and coil are indicated in vertical lines in order from the longest to the shortest.

a)

```

*
MDPYKYRPSSTFNAPMWSNSGAPVWNNDSLTVESRGPILLEDYHLVEK # 50
IADFDRERIPERVVHARGASAKGFFEVDVSHLTCAFLRAPGVQTPVI # 100
VRFSTVIHERGSPETLRDPRGFAIKFYTREGNWDLVGNFPVFFIRDGMK # 150
FPDMVHALKPNPKTHIQENWRILDLSHHPESLHMFTFLFDDIGVPADYR # 200
HMDGSGVNTYTLVNRAGKAHYVKFHWKPTCGVKSLLLEEAVTVGGTNHSH # 250
ATKDLTDSIAAGNYPEWTFYIQTIDPDHEERFDFDPLDVTKTWPEDVVPL # 300
QPVGRLVLNRNIDNFFSENEQLAFCPGIIVPGVDYSDDKLLQTRIFSSE # 350
TQRHRLGANYLLPANAPKWSHHNNHYDGLMFMHRDEEDYFPSRFDPA # 400
KHAPRYPIPSRTLNGRREKMVIEKENNFQKQGERYRMDPARQERFINRW # 450
IDALSDPRLTHEIKAIWLSQWSQADKSLGQKLASRLSSKPSM # 500
%1 ...Y...SSS.....T.....S..... # 50
%1 .....S.....T.....T..... # 100
%1 ...S.....S..T..... # 150
%1 .....S..... # 200
%1 ...S.....Y.....T...S..... # 250
%1 .T..T.....Y..T.....T..... # 300
%1 .....S.....Y.....T...SY.. # 350
%1 T.....S.....Y..... # 400
%1 ...Y.....Y.S..... # 450
%1 ...S...T.....S..S...S.....SS...

```

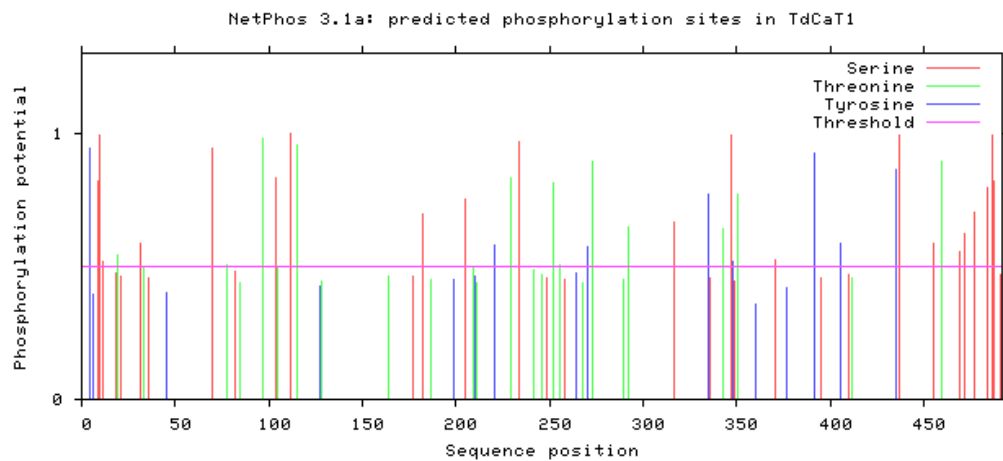

b)

| Predicted Sites |                          |        |        |           |
|-----------------|--------------------------|--------|--------|-----------|
| Position        | Peptide                  | Score  | Cutoff | Cluster   |
| 86              | HDVSHLT <b>C</b> ADFLRAP | 2,011  | 0      | Cluster B |
| 230             | KFWHWK <b>P</b> TCGVKSLL | 19,226 | 0      | Cluster C |
| 325             | ENEQLA <b>F</b> CPGIIVPG | 1,163  | 0      | Cluster B |
| 470             | IKAIWL <b>S</b> CWSQADKS | 0,322  | 0      | Cluster A |

**Supplementary Figure S2.** Bio-informatics analysis of TdCAT1 protein. **(a)** Identification of phosphorylation sites in TdCAT1 protein using NetPhos database **(b)** Identification of Nitrosylation sites in TdCAT1 structure using GPS-NSO software.

**Supplementary Table S1.** List of primers used in PCR amplification of TdCAT1 and its truncated forms. The forward primer CF was used for the amplification of all forms with the use of reverse primers corresponding of each one.

| Amplified fragments        | Nucleotide sequences      | Primers names |
|----------------------------|---------------------------|---------------|
| <b>TdCAT1</b>              | TCGAATTCATGGACCCCTACAAGTA | CF            |
| <b>TdCAT<sub>200</sub></b> | ATCTCGAGTTACATGCTCGGCTTGG | CR1           |
| <b>TdCAT<sub>295</sub></b> | ATCTCGAGGGCGGTAGTCGGCGGG  | CR2           |
| <b>TdCAT<sub>340</sub></b> | ATCTCGAGCCTCGGGCCACGTCTTG | CR3           |
| <b>TdCAT<sub>400</sub></b> | ATCTCGAGGGTGAGGCGGGGGTCC  | CR4           |
| <b>TdCAT<sub>460</sub></b> | ATCTCGAGGGGTGAGGCGGGGGTC  | CR5           |

**Supplementary Table S2.** Secondary structure analysis of plant catalase using SOPMA program ([https://npsa-prabi.ibcp.fr/cgi-bin/npsa\\_automat.pl?page=/NPSA/npsa\\_sopma.html](https://npsa-prabi.ibcp.fr/cgi-bin/npsa_automat.pl?page=/NPSA/npsa_sopma.html)). 14 different catalase proteins were used to study the secondary structure of those proteins: [*Triticum turgidum* subsp. durum]: TdCAT1 (GenBank: AKC00864.1); [*Triticum aestivum*]: TaCAT1 (GenBank: XP\_044371531.1); [*Aegilops tauschii* subsp. *strangulata*] (GenBank: XP\_020164896.1); [*Triticum monococcum*]: TmCAT1 (GenBank: QBZ38484.1); [*Brachypodium distachyon*]: BdCAT1 (GenBank: XP\_003558892.1); [*Triticum dicoccoides*] (GenBank: XP\_037426584.1); [*Panax ginseng*]: (GenBank: EU327037); [*Soldanella alpina*]: (GenBank: O24339); [*Gossypium hirsutum*] (GenBank: XP\_016687939.1); [*Lotus japonicus*] (GenBank: AAR84578); [*Gossypium raimondii*] (GenBank: XP\_012446280.1) and [*Arachis ipaensis*] (GenBank: XP\_016167161.1).

| Protein        | $\alpha$ -helices | $\beta$ -turns | random coils | extended strands |
|----------------|-------------------|----------------|--------------|------------------|
| <b>TdCat1</b>  | 135               | 27             | 256          | 74               |
| <b>TaCat1</b>  | 140               | 27             | 242          | 83               |
| <b>AetCAT1</b> | 127               | 30             | 258          | 77               |
| <b>TmCAT1</b>  | 137               | 30             | 249          | 76               |
| <b>BdCat1</b>  | 134               | 29             | 257          | 72               |
| <b>AtCat1</b>  | 126               | 31             | 260          | 75               |
| <b>TdcCAT1</b> | 131               | 28             | 258          | 75               |
| <b>PgCAT1</b>  | 138               | 29             | 250          | 75               |
| <b>SaCAT1</b>  | 135               | 27             | 253          | 77               |
| <b>GhCAT1</b>  | 139               | 29             | 249          | 75               |
| <b>LjCAT1</b>  | 130               | 25             | 262          | 75               |
| <b>EsCAT1</b>  | 137               | 28             | 255          | 72               |
| <b>GrCAT1</b>  | 141               | 29             | 248          | 74               |
| <b>AiCAT1</b>  | 134               | 32             | 247          | 79               |
